# Supplementary material
Source: PubMed Central journal article supplement (PMC7138198)
Supplement: kaup-16-04-1632121-s001.pdf [file kaup-16-04-1632121-s001.pdf]

All tissues (*bpIs151, Psqst-1::SQST-1::GFP*)

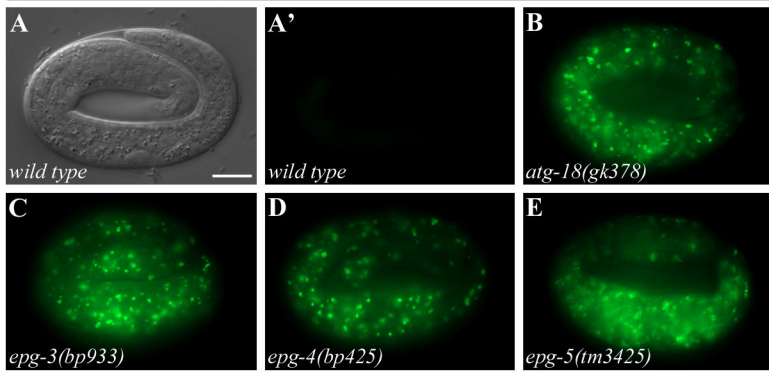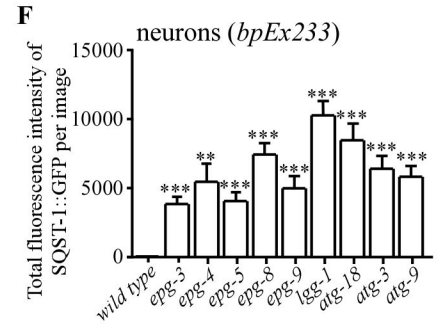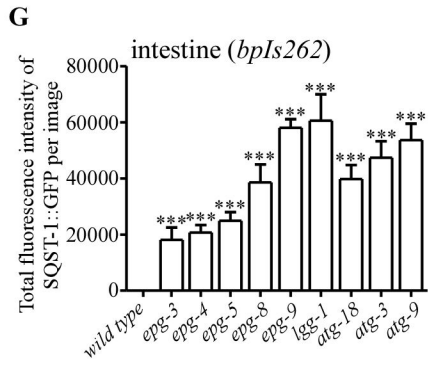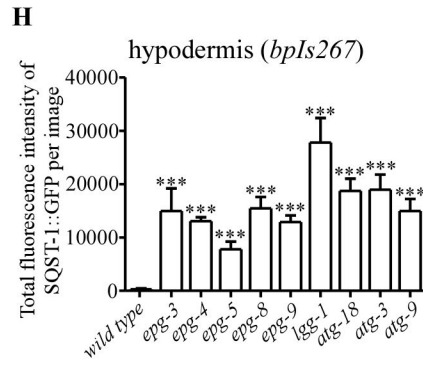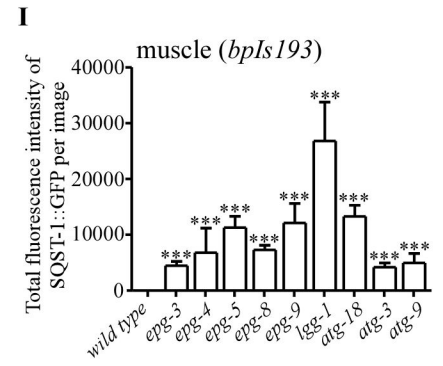

Figure S1

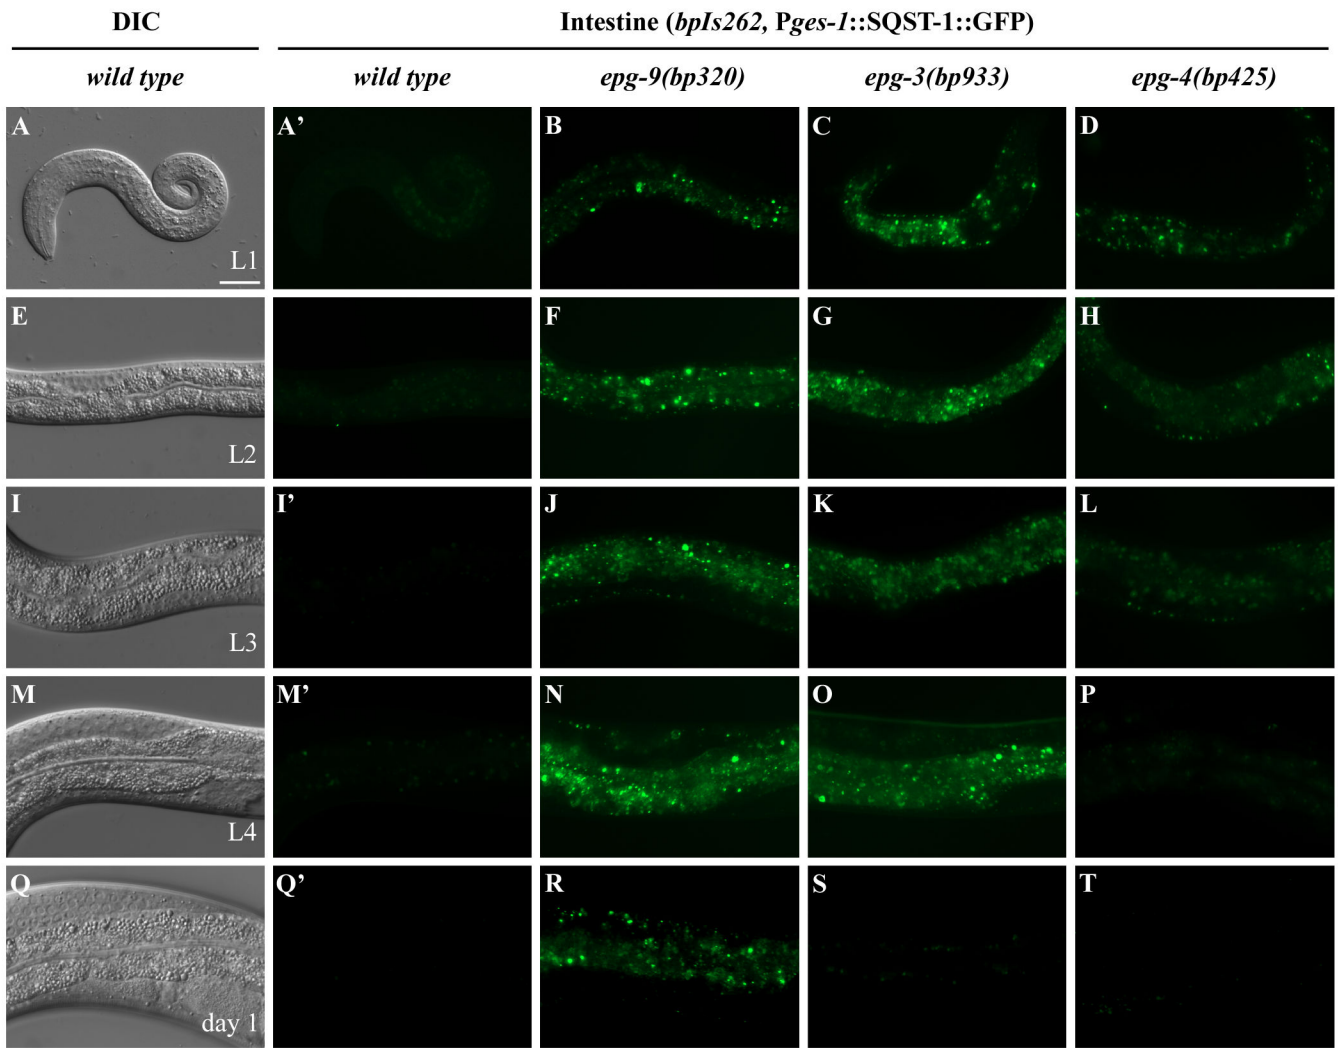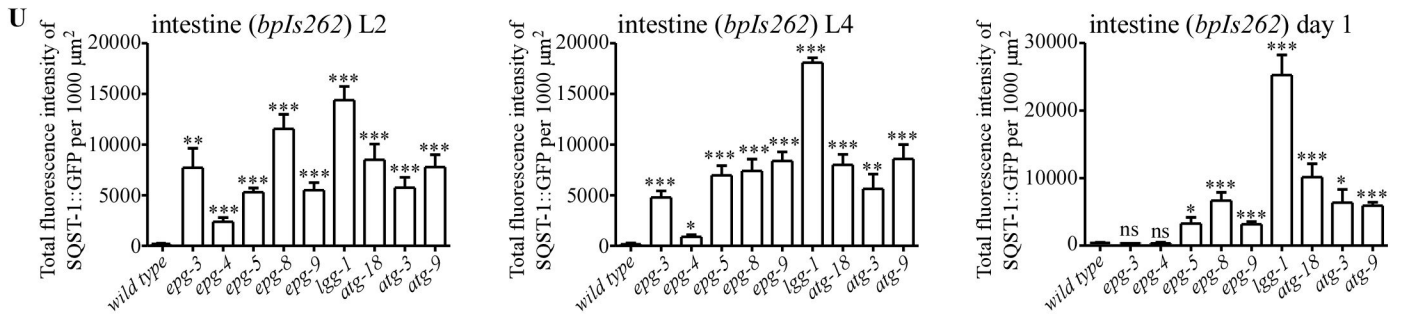

Figure S2

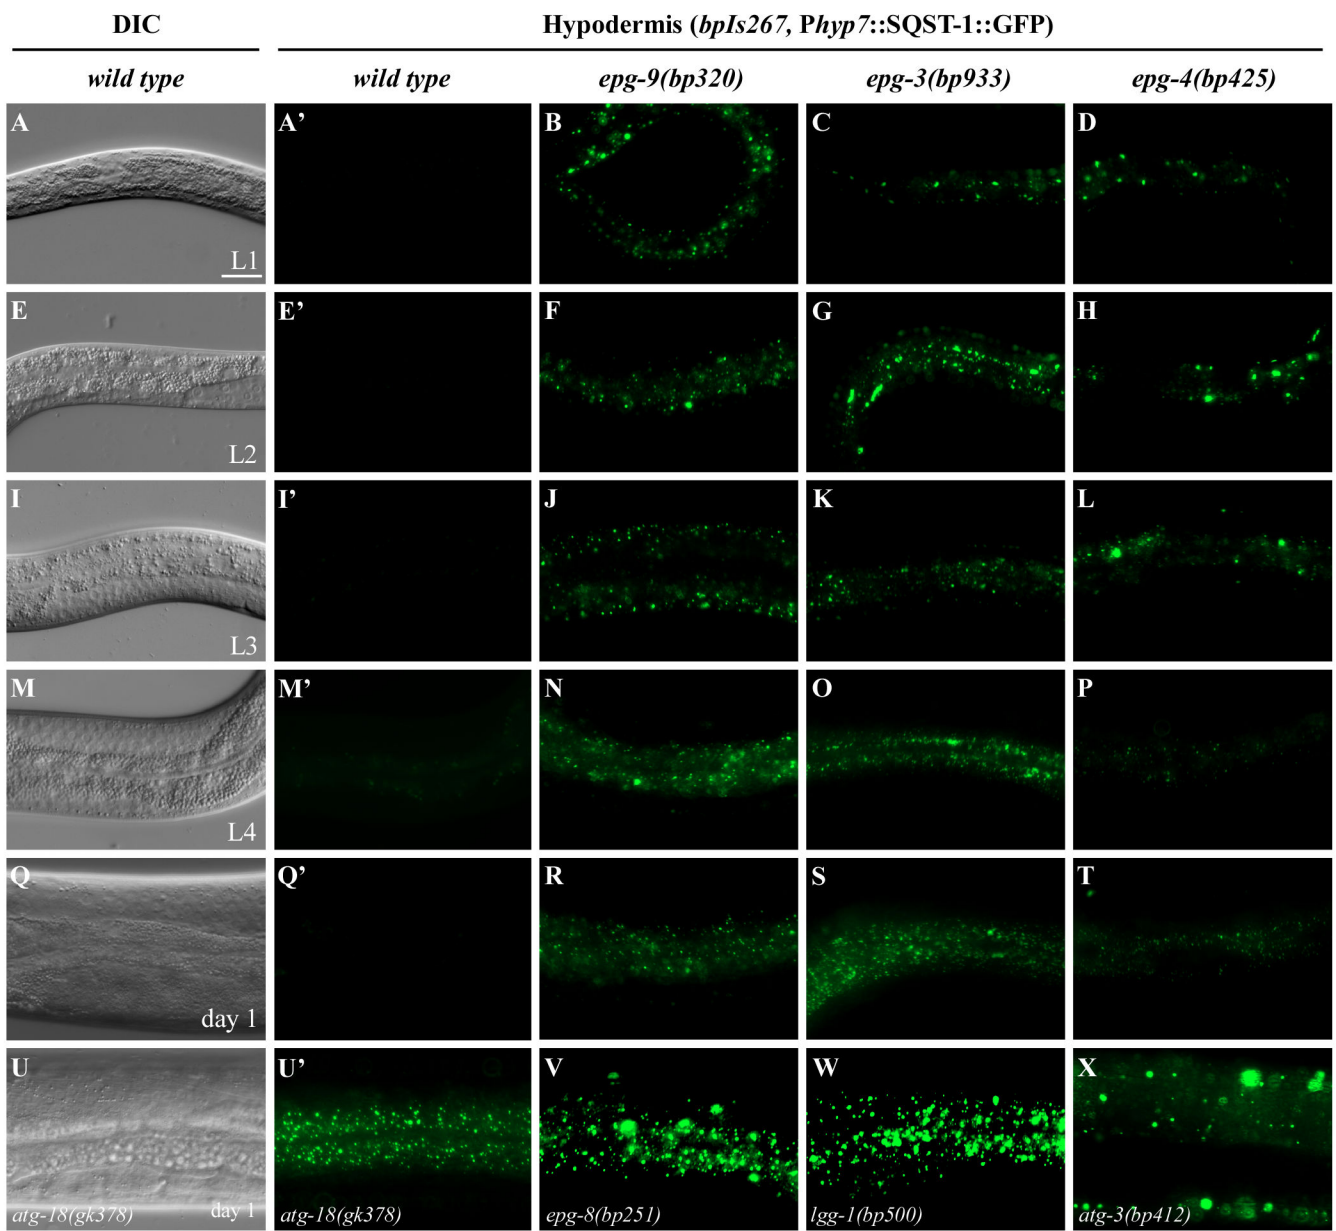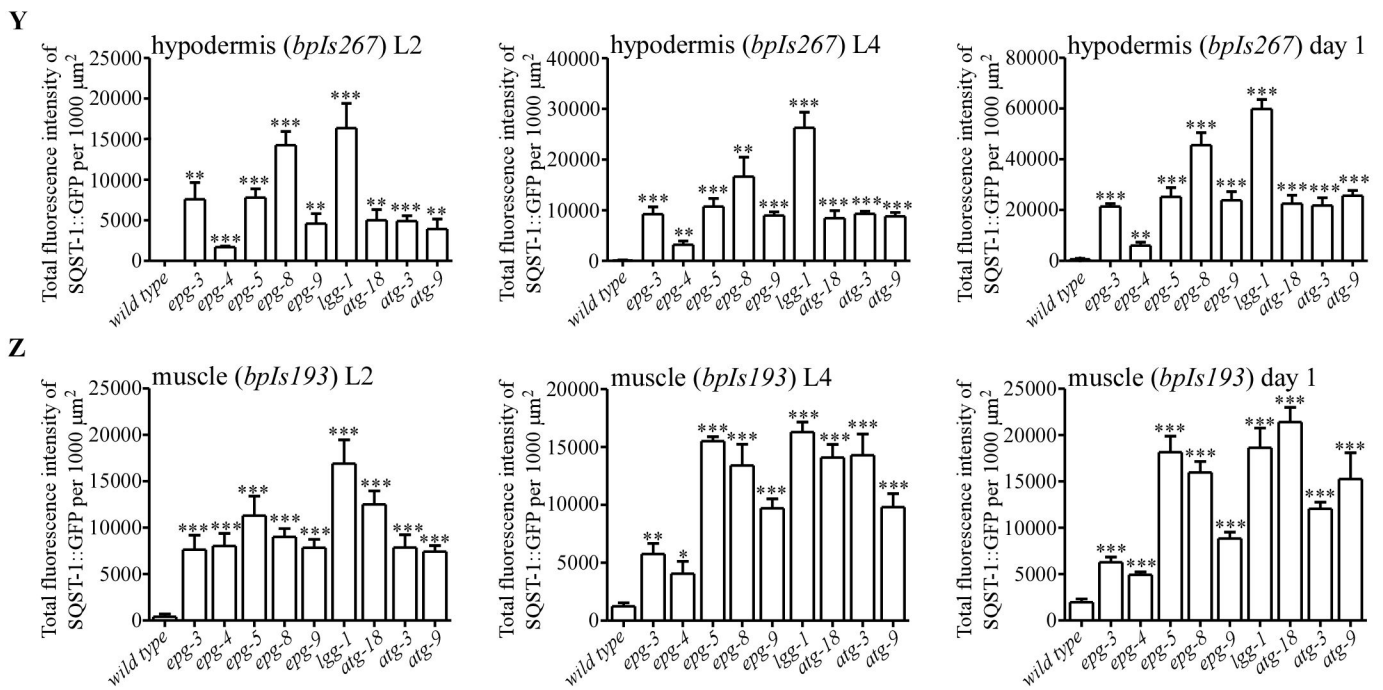

Figure S3

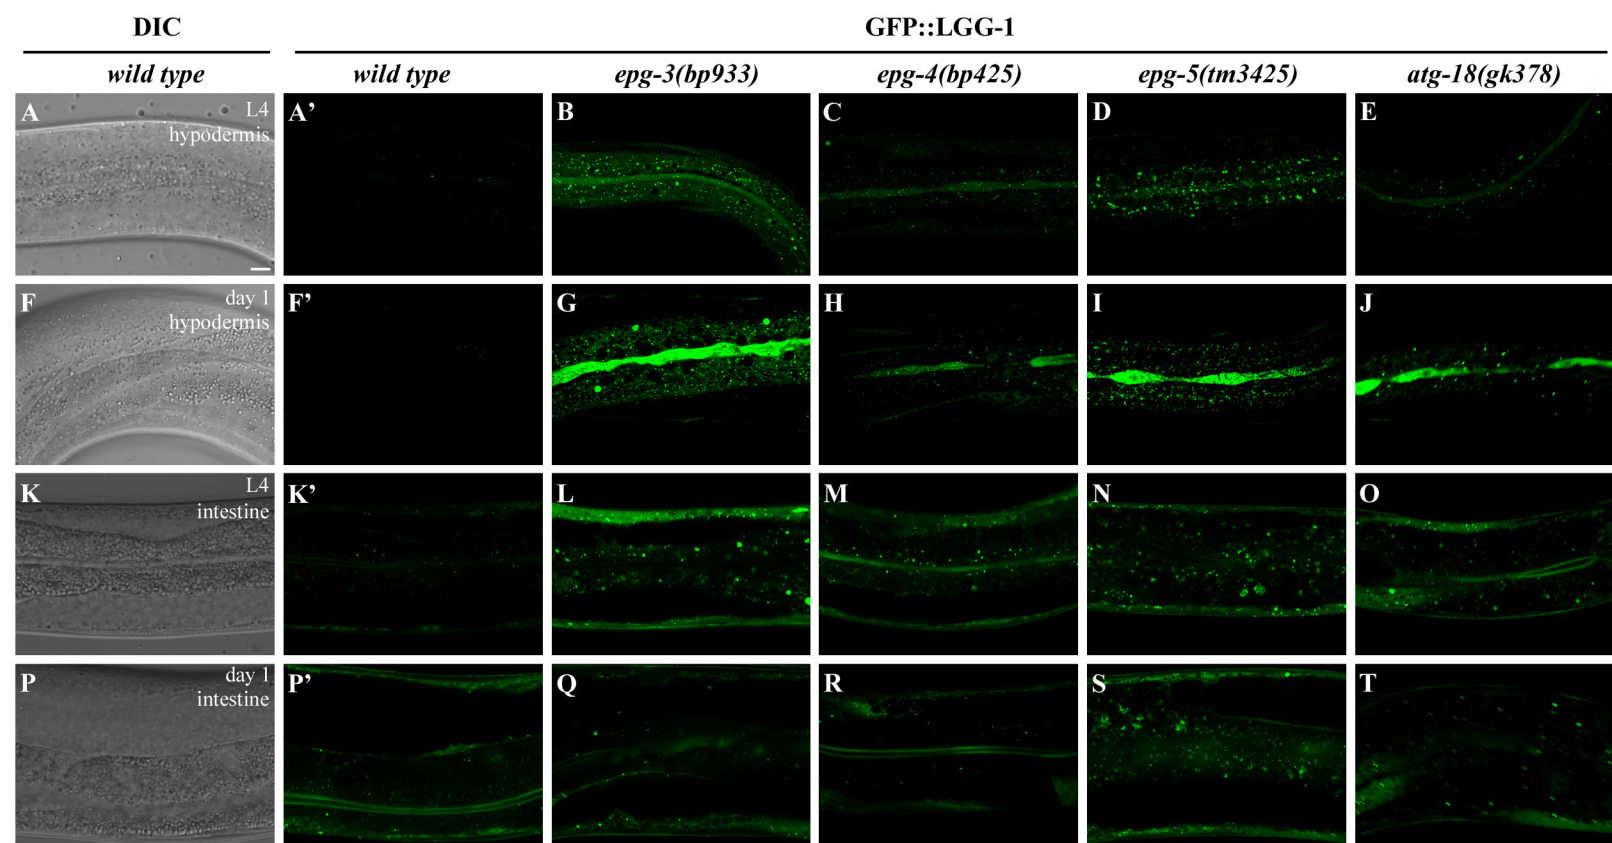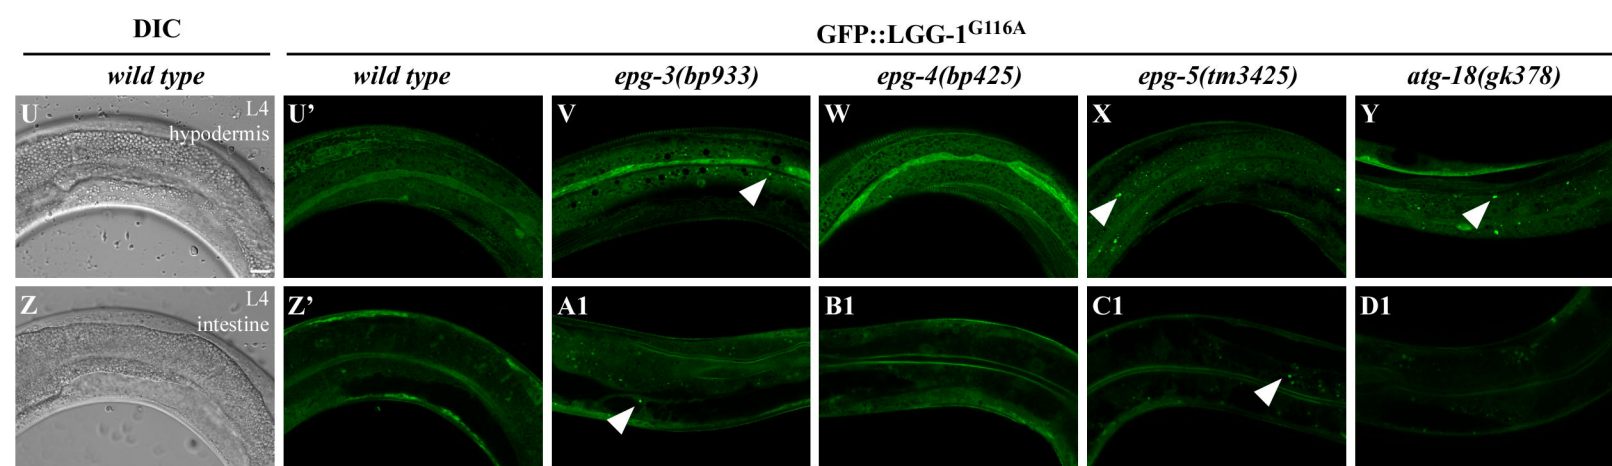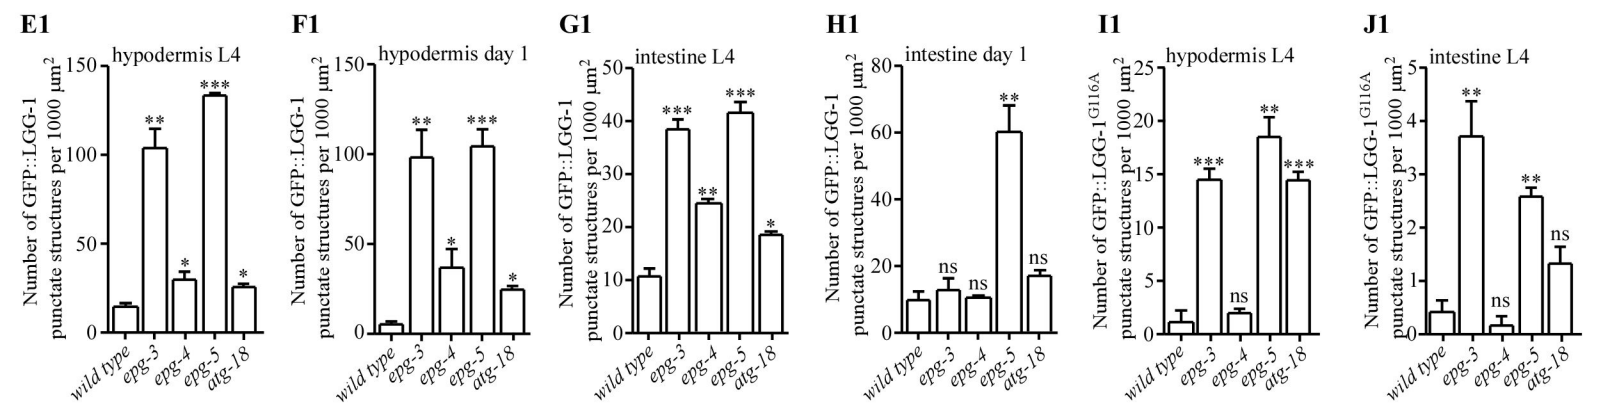

Figure S4

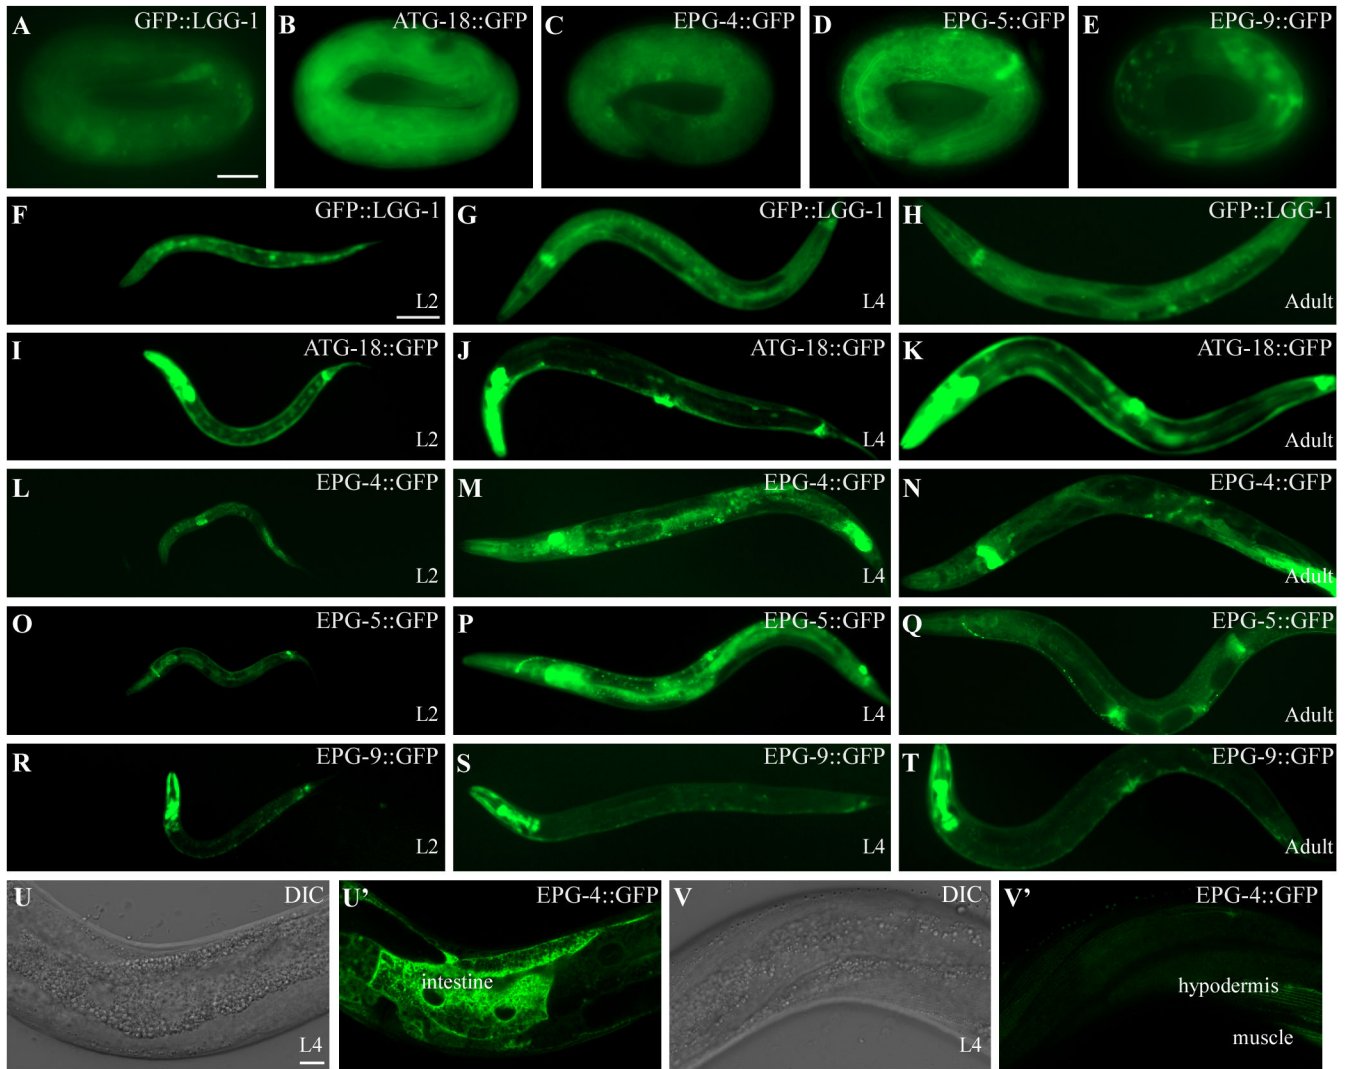

Figure S5

Cells in head region (*bpIs151*, *Psqst-1::SQST-1::GFP*)

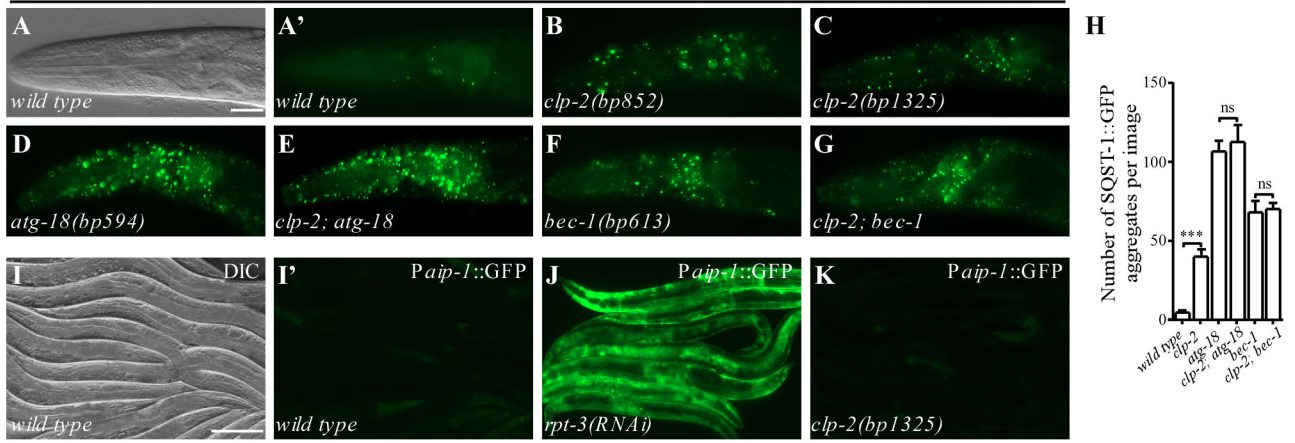

Hypodermis (*bpIs267*, *Phyp7::SQST-1::GFP*)

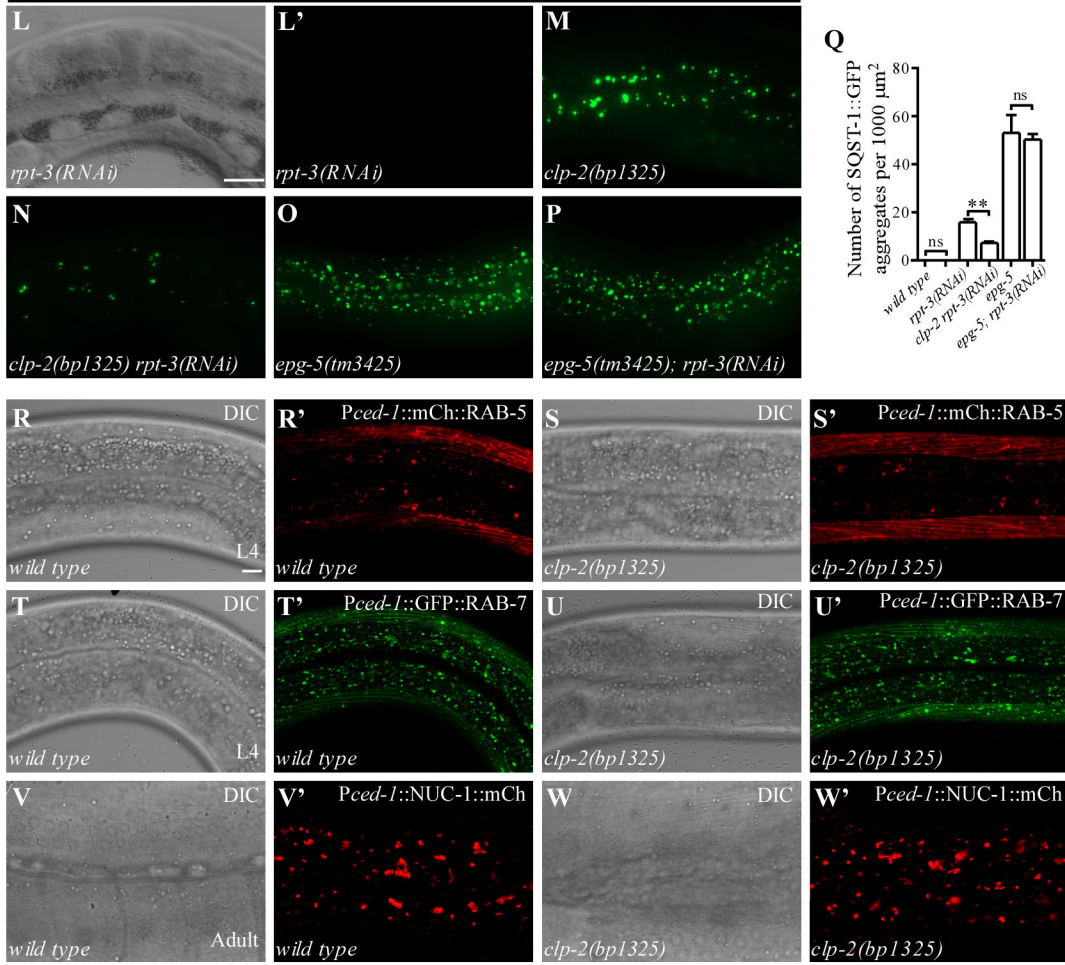

Figure S6

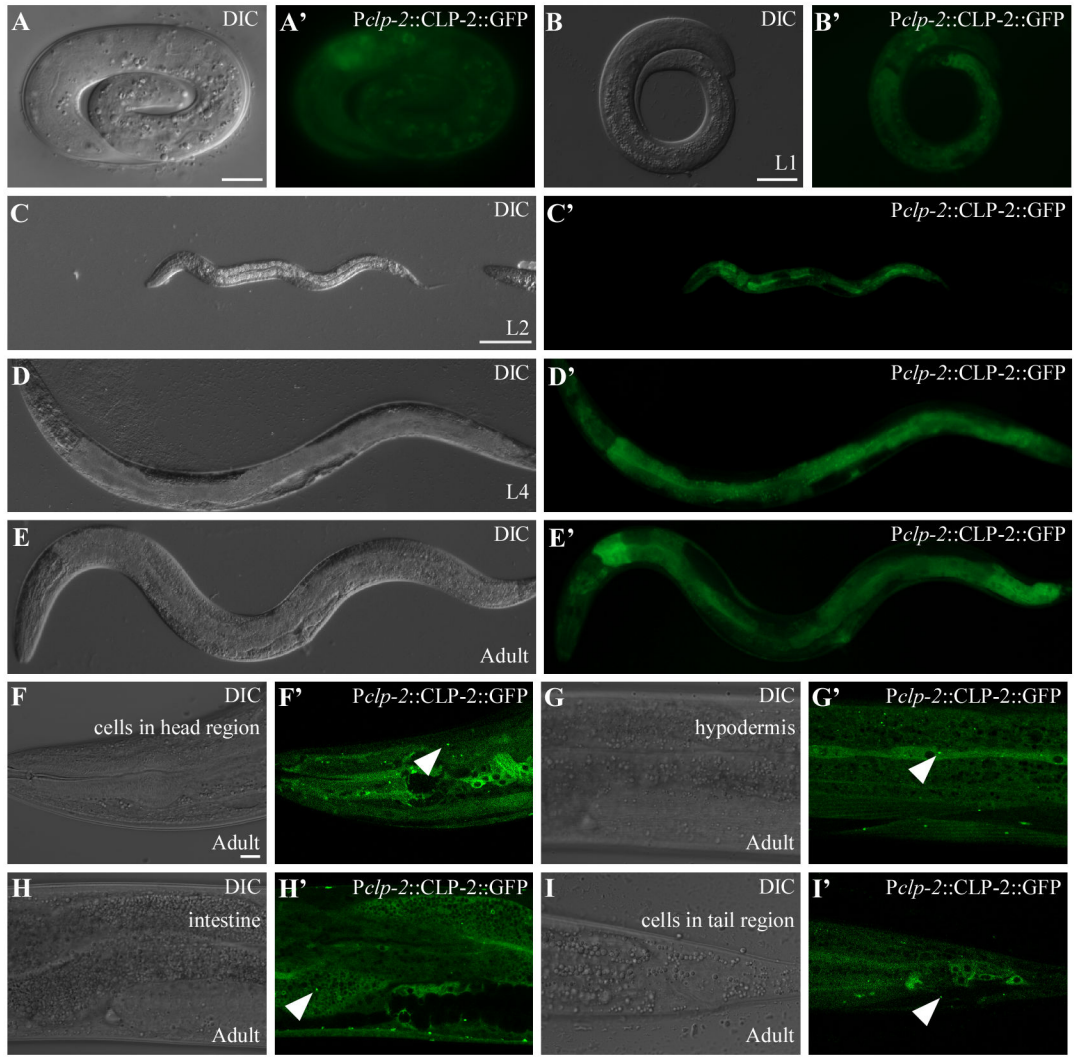

Figure S7

Cells in head region (*bpIs151*, *Psqst-1::SQST-1::GFP*)

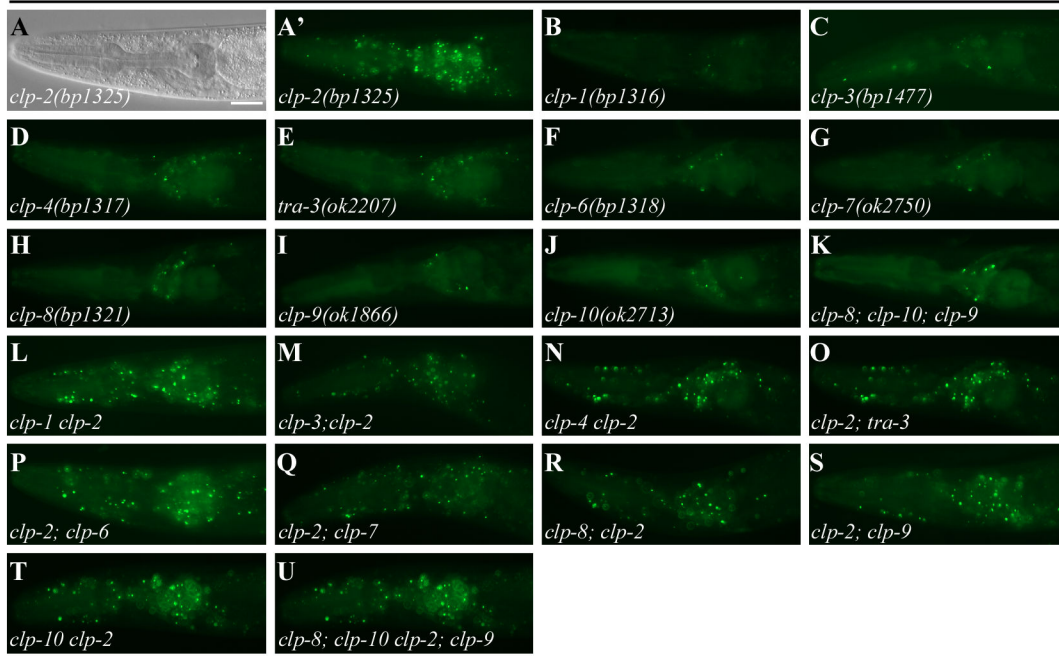

Figure S8



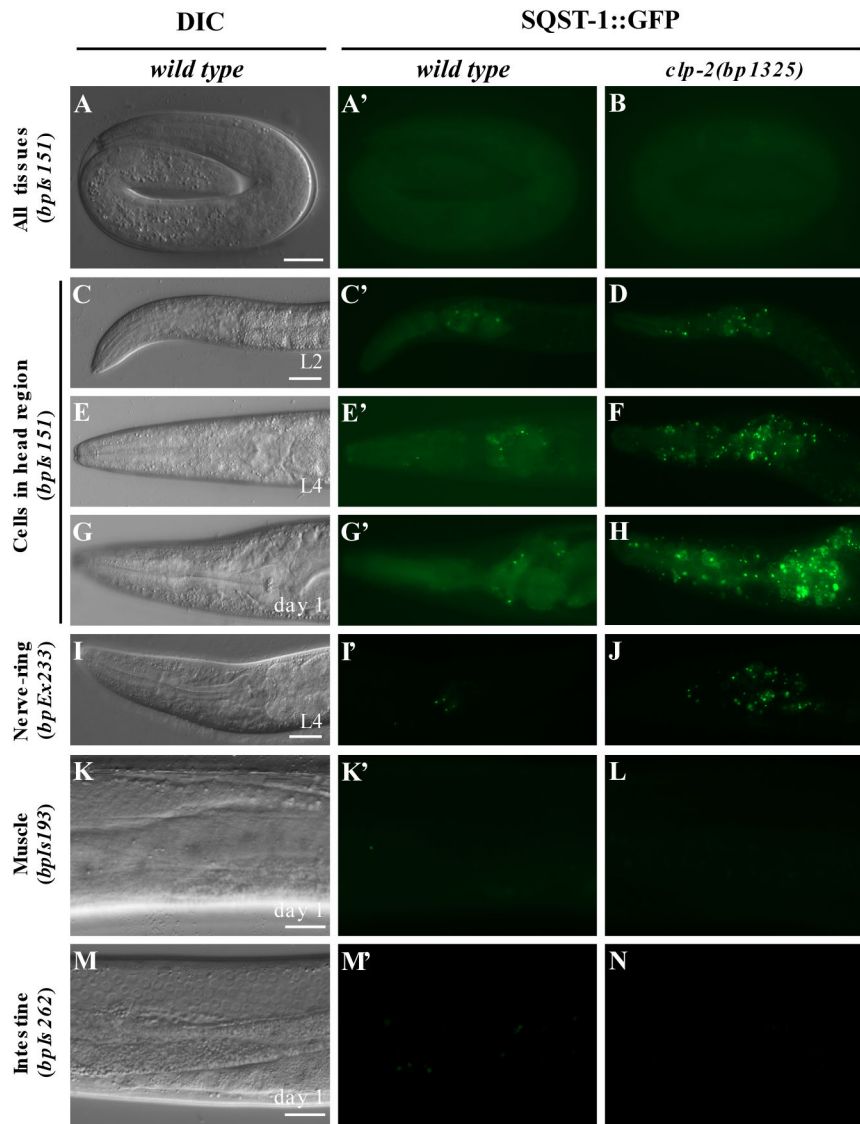

Figure S9
